# Supplementary material for: Clonal Hematopoiesis after Autologous Stem Cell Transplantation Does Not Confer Adverse Prognosis in Patients with AML
Source: MDPI journal article supplement (doi:10.3390/cancers13133190), 2021-06-25

# Clonal hematopoiesis after autologous stem cell transplantation does not confer adverse prognosis in patients with AML following autologous stem cell transplantation

## Supplemental Material

**Figure S1: Distribution of mutations and variant allele frequencies (VAFs).** **A:** Absolute numbers of CH-mutations in *DNMT3A*, *TET2* and *ASXL1* detected at diagnosis and during complete remission in the absence of leukemia-related mutations. **B:** Variant allele frequencies of CH-related mutations in *DNMT3A*, *TET2* and *ASXL1* observed during complete remission. Grey dashes indicate medians.

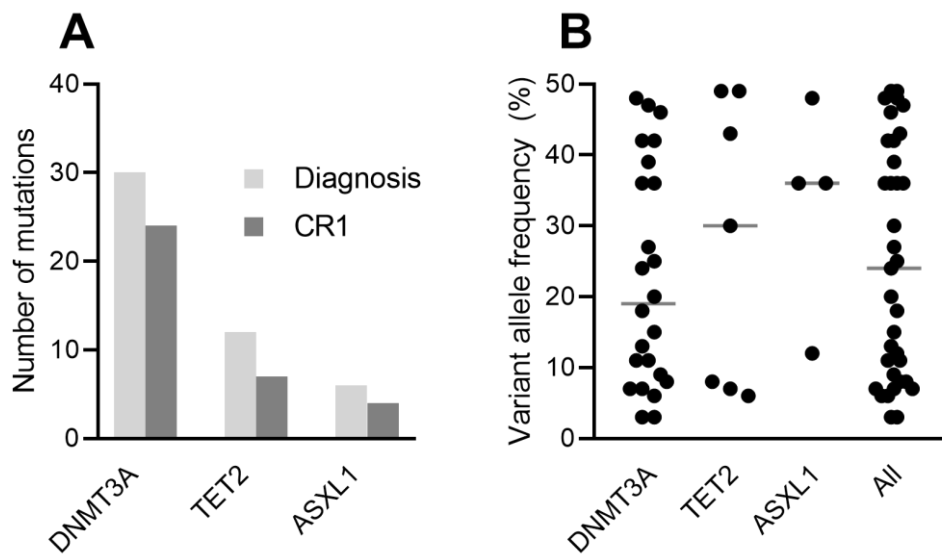

**A** Progression free survival

Percent survival

Months

$P = .157$

Number at risk

| Months    | 0  | 24 | 48 | 72 | 96 | 120 | 144 | 168 | 192 |
|-----------|----|----|----|----|----|-----|-----|-----|-----|
| no CH     | 79 | 33 | 20 | 11 | 6  | 4   | 1   | 1   | 1   |
| DNMT3A-CH | 24 | 11 | 8  | 7  | 5  | 4   | 3   | 2   | 2   |

1 — no CH  
2 — DNMT3A-CH

**B** Overall survival

Percent survival

Months

$P = .339$

Number at risk

| Months    | 0  | 24 | 48 | 72 | 96 | 120 | 144 | 168 | 192 |
|-----------|----|----|----|----|----|-----|-----|-----|-----|
| no CH     | 79 | 43 | 25 | 12 | 6  | 4   | 1   | 1   | 1   |
| DNMT3A-CH | 24 | 14 | 11 | 9  | 6  | 5   | 3   | 2   | 2   |

1 — no CH  
2 — DNMT3A-CH

**C** Progression free survival

Percent survival

Months

$P = .909$

Number at risk

| Months  | 0  | 24 | 48 | 72 | 96 | 120 | 144 | 168 | 192 |
|---------|----|----|----|----|----|-----|-----|-----|-----|
| no CH   | 79 | 33 | 20 | 11 | 6  | 4   | 1   | 1   | 1   |
| TET2-CH | 7  | 4  | 3  | 3  | 2  | 2   | 1   | 1   | 1   |

1 — no CH  
1 — TET2-CH

**D** Overall survival

Percent survival

Months

$P = .641$

Number at risk

| Months  | 0  | 24 | 48 | 72 | 96 | 120 | 144 | 168 | 192 |
|---------|----|----|----|----|----|-----|-----|-----|-----|
| no CH   | 79 | 43 | 25 | 12 | 6  | 4   | 1   | 1   | 1   |
| TET2-CH | 7  | 4  | 4  | 4  | 4  | 3   | 1   | 1   | 1   |

1 — no CH  
1 — TET2-CH

**E** Progression free survival

Percent survival

Months

$P = .203$

Number at risk

| Months   | 0  | 24 | 48 | 72 | 96 | 120 | 144 | 168 | 192 |
|----------|----|----|----|----|----|-----|-----|-----|-----|
| no CH    | 79 | 33 | 20 | 11 | 6  | 4   | 1   | 1   | 1   |
| ASXL1-CH | 4  | 4  | 3  | 3  | 2  | 2   | 1   | 1   | 1   |

1 — no CH  
1 — ASXL1-CH

**F** Overall survival

Percent survival

Months

$P = .338$

Number at risk

| Months   | 0  | 24 | 48 | 72 | 96 | 120 | 144 | 168 | 192 |
|----------|----|----|----|----|----|-----|-----|-----|-----|
| no CH    | 79 | 43 | 25 | 12 | 6  | 4   | 1   | 1   | 1   |
| ASXL1-CH | 4  | 4  | 3  | 3  | 2  | 2   | 1   | 1   | 1   |

1 — no CH  
1 — ASXL1-CH

**G** Progression free survival

Percent survival

Months

$P = .721$

Number at risk

| Months        | 0  | 24 | 48 | 72 | 96 | 120 | 144 | 168 | 192 |
|---------------|----|----|----|----|----|-----|-----|-----|-----|
| no CH         | 79 | 33 | 20 | 11 | 6  | 4   | 1   | 1   | 1   |
| non-DNMT3A-CH | 7  | 6  | 3  | 3  | 2  | 2   | 1   | 1   | 1   |

1 — no CH  
1 — non-DNMT3A-CH

**H** Overall survival

Percent survival

Months

$P = .440$

Number at risk

| Months        | 0  | 24 | 48 | 72 | 96 | 120 | 144 | 168 | 192 |
|---------------|----|----|----|----|----|-----|-----|-----|-----|
| no CH         | 79 | 43 | 25 | 12 | 6  | 4   | 1   | 1   | 1   |
| non-DNMT3A-CH | 7  | 5  | 3  | 3  | 2  | 2   | 1   | 1   | 1   |

1 — no CH  
1 — non-DNMT3A-CH

**Figure S3: Survival according to different VAF (variant allele frequencies) cutoffs.** Kaplan-Meier survival estimates of patients with and without CH determined at different VAF (variant allele frequency) cutoffs. **A-B:** Cutoff at 5% VAF. **C-D:** Cutoff at 10% VAF.

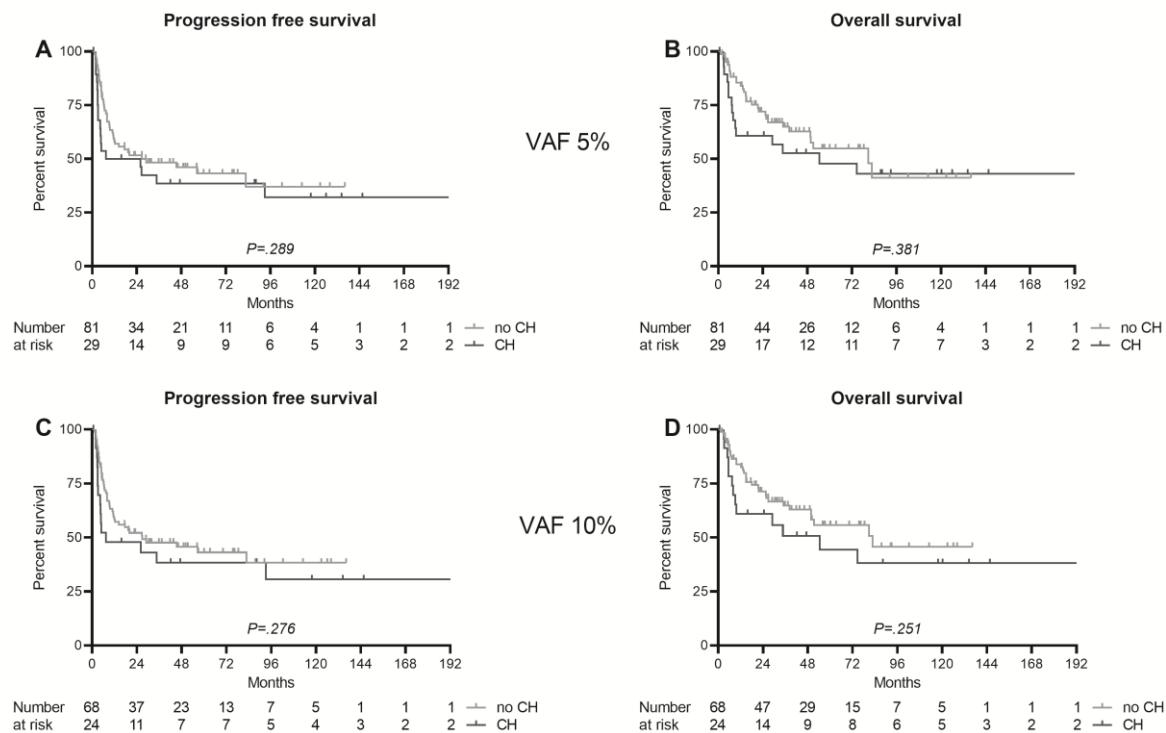

Supplement: s1 [file s1]
